# Supplementary material for: Impact of selective licensing schemes for private rental housing on mental health and social outcomes in Greater London, England: a natural experiment study
Source: PubMed Central journal article supplement (PMC9791445; doi:10.1136/bmjopen-2022-065747), 2022-12-23
Supplement: bmjopen-2022-065747supp001.pdf [file bmjopen-2022-065747supp001.pdf]

## Supplementary materials

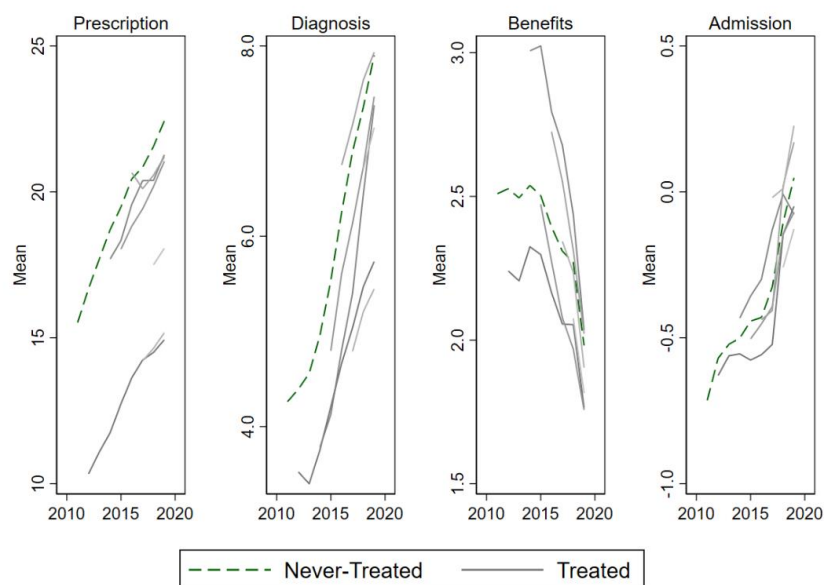

**Supplementary Figure 1** Trend in Small Area Mental Health Index (SAMHI) sub-scores (PRESCRIPTION, DIAGNOSIS, BENEFITS, ADMISSION) for never-treated versus treated areas in Greater London, 2011-2019. Treated areas shown from year of initiation onwards..

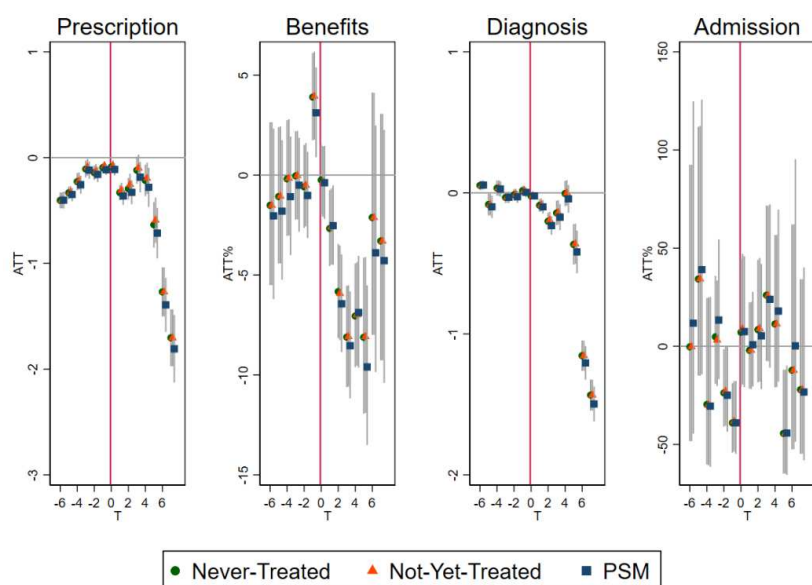

**Supplementary Figure 2** Average treatment effect on the treated (ATT) for area-level impacts of selective licencing (SL) on Small Area Mental Health Index (SAMHI) underlying indicators PRESCRIPTION, BENEFITS, DIAGNOSIS, and ADMISSION, in Greater London, 2011-2019. BENEFITS and ADMISSION were ln-transformed and ATT shown as ATT%.

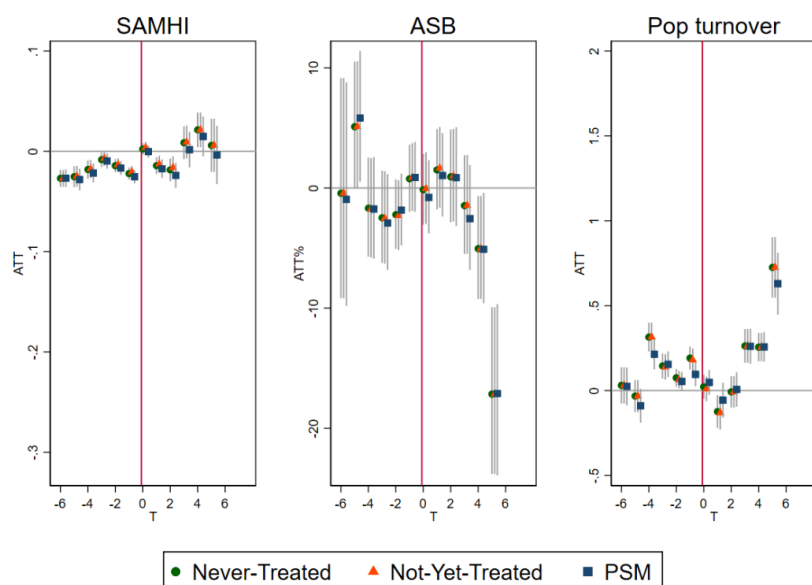

**Supplementary Figure 3** Sensitivity check excluding the earliest scheme initiated 2012 (“Olympic”). Average treatment effect on the treated (ATT) for area-level impacts of selective licencing (SL) on Small Area Mental Health Index (SAMHI), Antisocial behaviour (ASB) calls, and population (Pop) turnover in Greater London, 2011-2019. ASB was ln-transformed and ATT shown as ATT%.

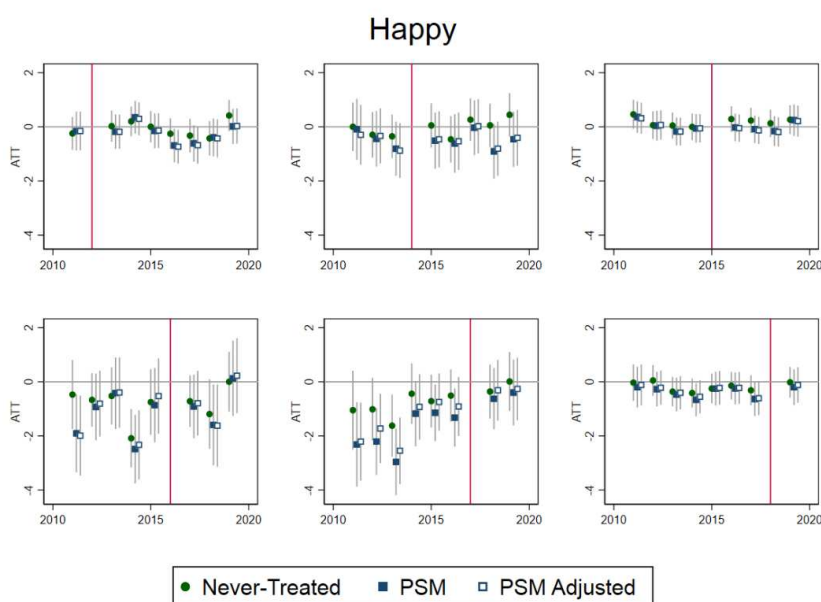

**Supplementary Figure 4** Happy. Average treatment effect on the treated (ATT) for individual-level impacts of selective licencing (SL) on self-reported happy score among private renters in Greater London by year of SL introduction, 2011-2019. Time-varying covariates in PSM Adjusted were: age group, sex, native birth, and occupational class. Abbreviations: Propensity Score Matching (PSM).

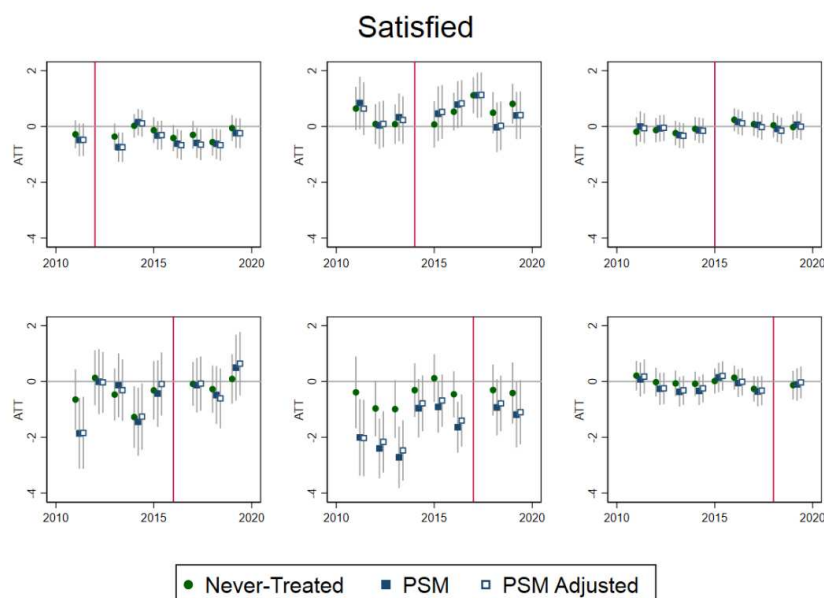

**Supplementary Figure 5** Satisfied. Average treatment effect on the treated (ATT) for individual-level impacts of selective licencing (SL) on self-reported satisfied score among private renters in Greater London by year of SL introduction, 2011-2019. Time-varying covariates in PSM Adjusted were: age group, sex, native birth, and occupational class. Abbreviations: Propensity Score Matching (PSM).

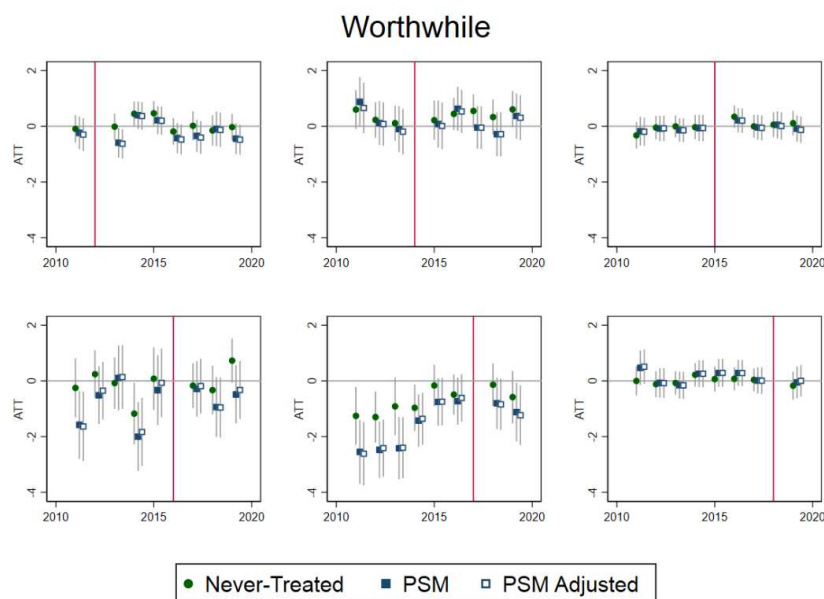

**Supplementary Figure 6** Worthwhile. Average treatment effect on the treated (ATT) for individual-level impacts of selective licencing (SL) on self-reported worthwhile score among private renters in Greater London by year of SL introduction, 2011-2019. Time-varying covariates in PSM Adjusted were: age group, sex, native birth, and occupational class. Abbreviations: Propensity Score Matching (PSM).

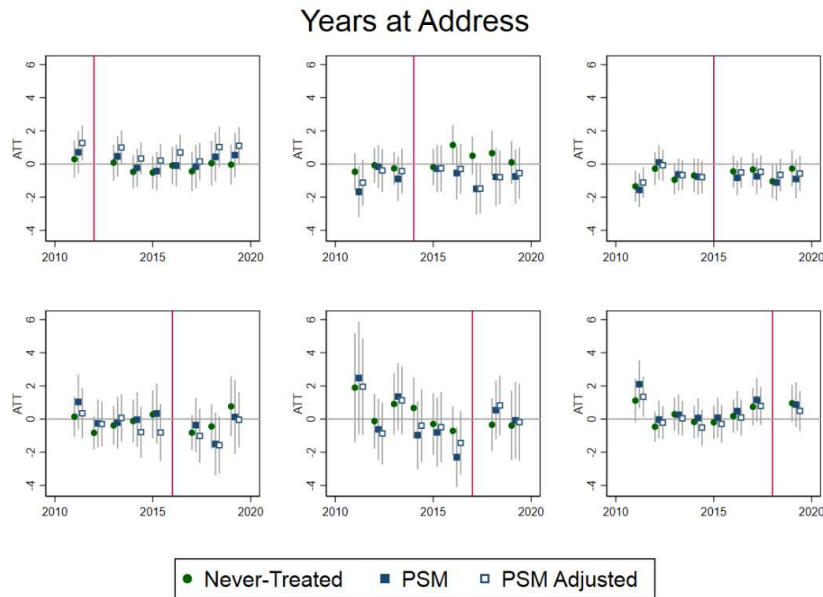

**Supplementary Figure 7** Years at address. Average treatment effect on the treated (ATT) for individual-level impacts of selective licencing (SL) on self-reported years at address among private renters in Greater London by year of SL introduction, 2011-2019. Time-varying covariates in PSM Adjusted were: age group, sex, native birth, and occupational class. Abbreviations: Propensity Score Matching (PSM).

**Supplementary Table 1** Baseline characteristics for Never-Treated and PSM control areas (LSOA) in Greater London, 2011. PSM controls were used for area-level impacts overall and for each year of treatment initiation, 2012 and 2014-2018, for individual-level impacts. Mean differences tested with a t-test except for Built pre-1945, which was tested with a Chi-square test ( $\alpha=.05$ ). Variables (Data source): Income deprived, Poor housing condition, No central heating, Unaffordable housing (Department for Communities and Local Government 2015b); Built pre-1945 (ONS 2021b); All other (ONS 2015a). Abbreviations: Lower Layer Super output Area (LSOA), Propensity Score Matched (PSM).

| Characteristics              | All interventions               |                          |              |                |              |
|------------------------------|---------------------------------|--------------------------|--------------|----------------|--------------|
|                              | Treated<br>N=921                | Never-Treated<br>N=3,582 | P-value      | PSM<br>N=2,763 | P-value      |
| Children <16yr per pop       | 22.2                            | 19.3                     | <.001        | 22.2           | <b>0.839</b> |
| Adults 16-59yr per pop       | 64.1                            | 64.3                     | <b>0.436</b> | 63.8           | <b>0.217</b> |
| Income deprived per pop      | 19.3                            | 15.6                     | <.001        | 19.2           | <b>0.823</b> |
| native birth per pop         | 60                              | 65.3                     | <.001        | 60.6           | <b>0.267</b> |
| Private rented%              | 25.9                            | 23.4                     | <.001        | 25.3           | <b>0.288</b> |
| Social rented%               | 22.7                            | 22.5                     | <b>0.759</b> | 22.8           | <b>0.881</b> |
| Poor housing condition%      | 22.5                            | 22.4                     | <b>0.621</b> | 22.2           | <b>0.298</b> |
| No central heating%          | 2.9                             | 2.8                      | 0.013        | 2.9            | <b>0.906</b> |
| Overcrowded%                 | 23.9                            | 19.7                     | <.001        | 23.5           | <b>0.402</b> |
| Unaffordable housing measure | 2.4                             | 1.7                      | <.001        | 2.4            | <b>0.193</b> |
| Built pre-1945               | -                               | -                        | <.001        | -              | <b>0.434</b> |
| Characteristics              | Interventions initiated in 2012 |                          |              |                |              |
|                              | Treated<br>N=155                | Never-Treated<br>N=3,582 | P-value      | PSM<br>N=465   | P-value      |
| Children <16yr per pop       | 22.4                            | 19.3                     | <.001        | 23.2           | <b>0.153</b> |
| Adults 16-59yr per pop       | 68.2                            | 64.3                     | <.001        | 67.7           | <b>0.388</b> |
| Income deprived per pop      | 21.6                            | 15.6                     | <.001        | 22.9           | <b>0.15</b>  |
| native birth per pop         | 46.5                            | 65.3                     | <.001        | 47.4           | <b>0.286</b> |
| Private rented%              | 33.9                            | 23.4                     | <.001        | 33.4           | <b>0.66</b>  |
| Social rented%               | 28.9                            | 22.5                     | <.001        | 31.9           | <b>0.137</b> |

|                              |                                        |                      |              |            |              |
|------------------------------|----------------------------------------|----------------------|--------------|------------|--------------|
| Poor housing condition%      | 22.8                                   | 22.4                 | <b>0.368</b> | 22.7       | <b>0.763</b> |
| No central heating%          | 2.8                                    | 2.8                  | <b>0.807</b> | 2.8        | <b>0.906</b> |
| Overcrowded%                 | 34.9                                   | 19.7                 | <.001        | 34.8       | <b>0.946</b> |
| Unaffordable housing measure | 2.8                                    | 1.7                  | <.001        | 2.9        | <b>0.259</b> |
| Built pre-1945               | -                                      | -                    | <b>0.122</b> | -          | <b>0.186</b> |
| <b>Characteristics</b>       | <b>Interventions initiated in 2014</b> |                      |              |            |              |
|                              | <b>Treated</b>                         | <b>Never-Treated</b> |              | <b>PSM</b> |              |
|                              | N=110                                  | N=3,582              | P-value      | N=330      | P-value      |
| Children <16yr per pop       | 25.9                                   | 19.3                 | <.001        | 26.1       | <b>0.753</b> |
| Adults 16-59yr per pop       | 59.9                                   | 64.3                 | <.001        | 59.9       | <b>0.871</b> |
| Income deprived per pop      | 24.2                                   | 15.6                 | <.001        | 25.2       | <b>0.354</b> |
| native birth per pop         | 69.5                                   | 65.3                 | 0.003        | 69.2       | <b>0.83</b>  |
| Private rented%              | 17.5                                   | 23.4                 | <.001        | 16.7       | <b>0.361</b> |
| Social rented%               | 33                                     | 22.5                 | <.001        | 34.8       | <b>0.44</b>  |
| Poor housing condition%      | 23.1                                   | 22.4                 | <b>0.221</b> | 22.3       | <b>0.115</b> |
| No central heating%          | 3                                      | 2.8                  | <b>0.126</b> | 2.9        | <b>0.49</b>  |
| Overcrowded%                 | 19.9                                   | 19.7                 | <b>0.9</b>   | 20         | <b>0.86</b>  |
| Unaffordable housing measure | 2.7                                    | 1.7                  | <.001        | 2.74       | <b>0.793</b> |
| Built pre-1945               | -                                      | -                    | <b>0.498</b> | -          | <b>0.715</b> |
| <b>Characteristics</b>       | <b>Interventions initiated in 2015</b> |                      |              |            |              |
|                              | <b>Treated</b>                         | <b>Never-Treated</b> |              | <b>PSM</b> |              |
|                              | N=394                                  | N=3,582              | P-value      | N=1,182    | P-value      |
| Children <16yr per pop       | 21.5                                   | 19.3                 | <.001        | 21.3       | <b>0.468</b> |
| Adults 16-59yr per pop       | 62.8                                   | 64.3                 | <.001        | 62.2       | <b>0.083</b> |
| Income deprived per pop      | 17.5                                   | 15.6                 | <.001        | 16.6       | <b>0.073</b> |
| native birth per pop         | 65.6                                   | 65.3                 | <b>0.664</b> | 67         | <b>0.123</b> |
| Private rented%              | 22.6                                   | 23.4                 | <b>0.238</b> | 21.3       | <b>0.084</b> |
| Social rented%               | 19.7                                   | 22.5                 | 0.008        | 18.4       | <b>0.196</b> |
| Poor housing condition%      | 22                                     | 22.4                 | <b>0.25</b>  | 21.4       | <b>0.079</b> |
| No central heating%          | 3                                      | 2.8                  | 0.005        | 2.9        | <b>0.255</b> |
| Overcrowded%                 | 19.5                                   | 19.7                 | <b>0.7</b>   | 18.4       | <b>0.11</b>  |
| Unaffordable housing measure | 2.2                                    | 1.7                  | <.001        | 2          | <b>0.063</b> |
| Built pre-1945               | -                                      | -                    | 0.001        | -          | <b>0.723</b> |
| <b>Characteristics</b>       | <b>Interventions initiated in 2016</b> |                      |              |            |              |
|                              | <b>Treated</b>                         | <b>Never-Treated</b> |              | <b>PSM</b> |              |
|                              | N=28                                   | N=3,582              | P-value      | N=84       | P-value      |
| Children <16yr per pop       | 17.8                                   | 19.3                 | <b>0.106</b> | 16.5       | <b>0.319</b> |
| Adults 16-59yr per pop       | 72.4                                   | 64.3                 | <.001        | 74         | <b>0.42</b>  |
| Income deprived per pop      | 23.5                                   | 15.6                 | <.001        | 22         | <b>0.443</b> |
| native birth per pop         | 53.6                                   | 65.3                 | <.001        | 52         | <b>0.413</b> |
| Private rented%              | 33.5                                   | 23.4                 | <.001        | 36.6       | <b>0.341</b> |
| Social rented%               | 33.3                                   | 22.5                 | 0.005        | 28.8       | <b>0.239</b> |
| Poor housing condition%      | 25.8                                   | 22.4                 | 0.003        | 28         | <b>0.227</b> |
| No central heating%          | 3.1                                    | 2.8                  | <b>0.226</b> | 3.8        | <b>0.184</b> |
| Overcrowded%                 | 35.3                                   | 19.7                 | <.001        | 36.3       | <b>0.705</b> |
| Unaffordable housing measure | 3.2                                    | 1.7                  | <.001        | 2.8        | <b>0.21</b>  |
| Built pre-1945               | -                                      | -                    | 0.024        | -          | <b>0.827</b> |
| <b>Characteristics</b>       | <b>Interventions initiated in 2017</b> |                      |              |            |              |
|                              | <b>Treated</b>                         | <b>Never-Treated</b> |              | <b>PSM</b> |              |
|                              | N=59                                   | N=3,582              | P-value      | N=177      | P-value      |
| Children <16yr per pop       | 21.9                                   | 19.3                 | <.001        | 21.6       | <b>0.79</b>  |
| Adults 16-59yr per pop       | 65.5                                   | 64.3                 | <b>0.219</b> | 66         | <b>0.618</b> |
| Income deprived per pop      | 20.3                                   | 15.6                 | <.001        | 21.3       | <b>0.371</b> |
| native birth per pop         | 45.4                                   | 65.3                 | <.001        | 45.5       | <b>0.961</b> |
| Private rented%              | 33.2                                   | 23.4                 | <.001        | 35.1       | <b>0.345</b> |
| Social rented%               | 18.6                                   | 22.5                 | <b>0.141</b> | 20.1       | <b>0.547</b> |

|                              |                                        |                      |              |            |              |
|------------------------------|----------------------------------------|----------------------|--------------|------------|--------------|
| Poor housing condition%      | 24                                     | 22.4                 | 0.048        | 25.6       | <b>0.148</b> |
| No central heating%          | 2.7                                    | 2.8                  | <b>0.564</b> | 2.8        | <b>0.701</b> |
| Overcrowded%                 | 30.9                                   | 19.7                 | <.001        | 32.1       | <b>0.407</b> |
| Unaffordable housing measure | 3.5                                    | 1.7                  | <.001        | 3.3        | <b>0.245</b> |
| Built pre-1945               | -                                      | -                    | 0.027        | -          | <b>0.404</b> |
| <b>Characteristics</b>       | <b>Interventions initiated in 2018</b> |                      |              | <b>PSM</b> |              |
|                              | <b>Treated</b>                         | <b>Never-Treated</b> |              |            |              |
|                              | N=175                                  | N=3,582              | P-value      | N=525      | P-value      |
| Children <16yr per pop       | 21.9                                   | 19.3                 | <.001        | 22.1       | <b>0.806</b> |
| Adults 16-59yr per pop       | 64.3                                   | 64.3                 | <b>0.926</b> | 64         | <b>0.703</b> |
| Income deprived per pop      | 17.2                                   | 15.6                 | 0.027        | 17         | <b>0.787</b> |
| native birth per pop         | 58.8                                   | 65.3                 | <.001        | 58.8       | <b>0.998</b> |
| Private rented%              | 27.8                                   | 23.4                 | <.001        | 27.5       | <b>0.833</b> |
| Social rented%               | 17.2                                   | 22.5                 | <.001        | 17         | <b>0.884</b> |
| Poor housing condition%      | 21.8                                   | 22.4                 | <b>0.266</b> | 21.7       | <b>0.708</b> |
| No central heating%          | 2.8                                    | 2.8                  | <b>0.866</b> | 2.8        | <b>0.747</b> |
| Overcrowded%                 | 22.3                                   | 19.7                 | 0.004        | 22         | <b>0.785</b> |
| Unaffordable housing measure | 2.2                                    | 1.7                  | <.001        | 2.2        | <b>0.865</b> |
| Built pre-1945               | -                                      | -                    | 0.001        | -          | <b>0.955</b> |
